# Supplementary material for: The Seroprevalence of Severe Fever with Thrombocytopenia Syndrome: An Epidemiological Study of Korean Veterinary Hospital Workers
Source: MDPI journal article supplement (doi:10.3390/v15030609), 2023-02-23
Supplement: s1 [file s1]

## Supplementary Data

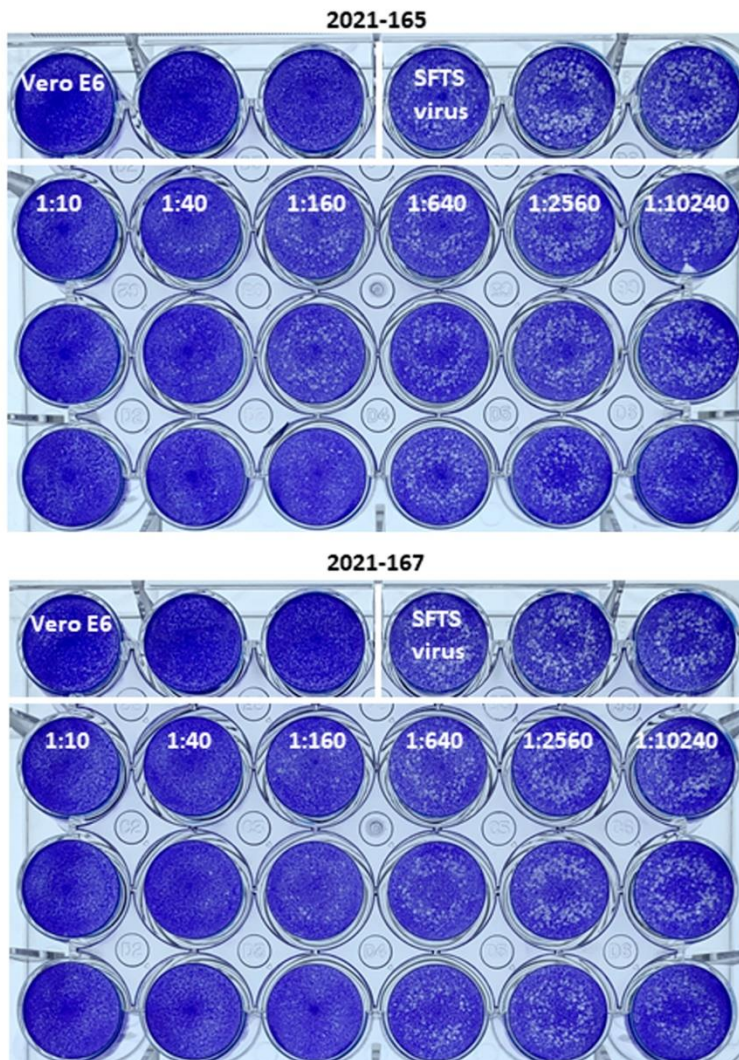

**Supplementary Figure S1.** Results of the PRNT in serum samples from 2 participants who were PRNT positive.

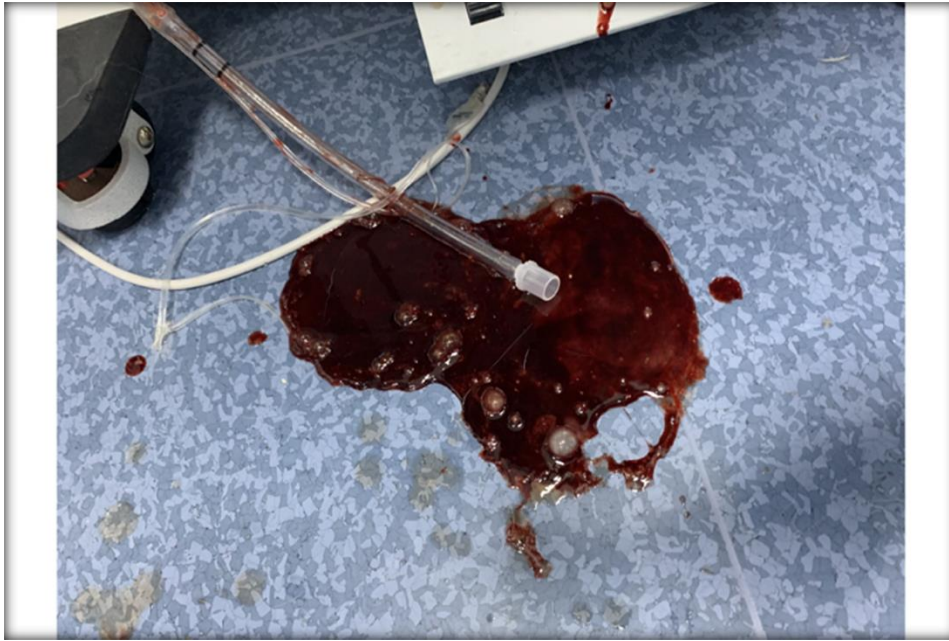

**Supplementary Figure S2.** Hematemesis of the Samoyed dog suspected of being infected with SFTS who came into contact with the 2 participants who tested positive for SFTSV-neutralizing antibodies.
